# Supplementary material for: Synthesis, crystal structures, and spectral properties of double N-alkylated dimethine cyanine dyes and their interactions with biomolecules and living cells
Source: Royal Society of Chemistry journal article supplement (doi:10.1039/c4ra10741a), 2014-11-27
Supplement: c4ra10741a1.pdf [file c4ra10741a1.pdf]

## Appendix A. Supplementary data

### 1. The spectra of HPLC of dyes C1-C6

HPLC conditions were set as follows: instrument model: shimadzu LC-20AD; detector: SPD-M20A; waters sunfire C<sub>18</sub>: 3.0 mm× 50 mm, 2.5 μm. The mobile phase A was water (0.05% TFA) and the mobile phase B was acetonitrile (0.05% TFA). The gradient program was as follows: 0–2 min, 20% to 95% B; 3 min, 95% B (V/V).

#### a. HPLC-C1

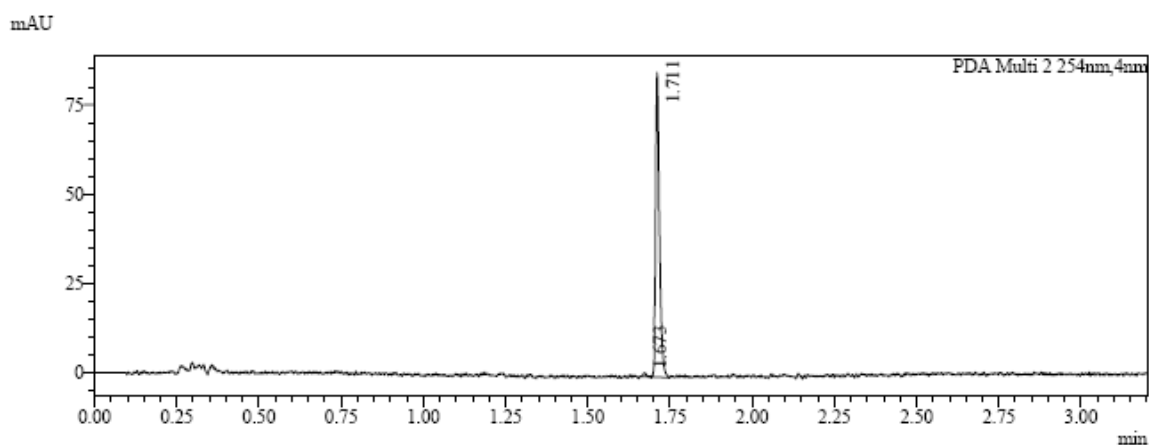

PDA Ch2 254nm

| Peak# | Ret. Time | Height | Height% | Area  | Area%   |
|-------|-----------|--------|---------|-------|---------|
| 1     | 1.673     | 926    | 1.102   | 674   | 0.962   |
| 2     | 1.711     | 83131  | 98.898  | 69411 | 99.038  |
| Total |           |        |         | 70086 | 100.000 |

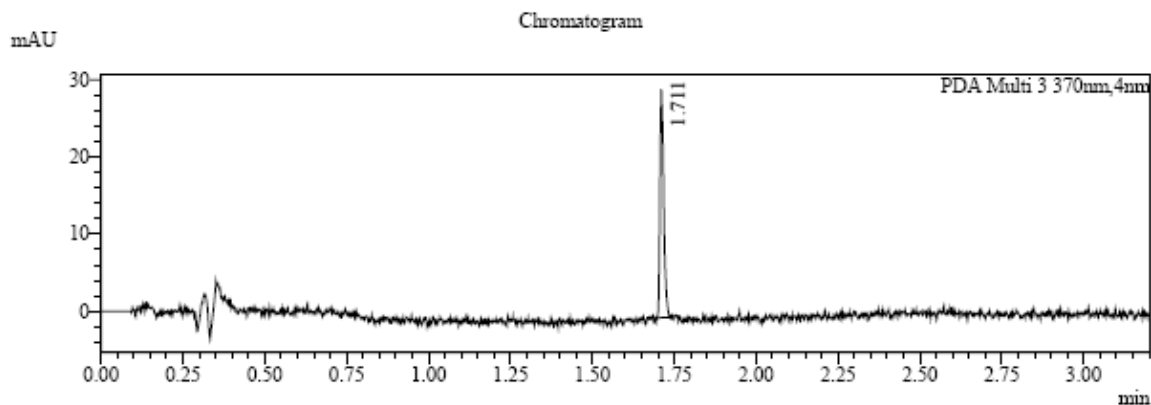

Peak Table

PDA Ch3 370nm

| Peak# | Ret. Time | Height | Height% | Area  | Area%   |
|-------|-----------|--------|---------|-------|---------|
| 1     | 1.711     | 23079  | 100.000 | 23353 | 100.000 |
| Total |           | 23079  | 100.000 | 23353 | 100.000 |

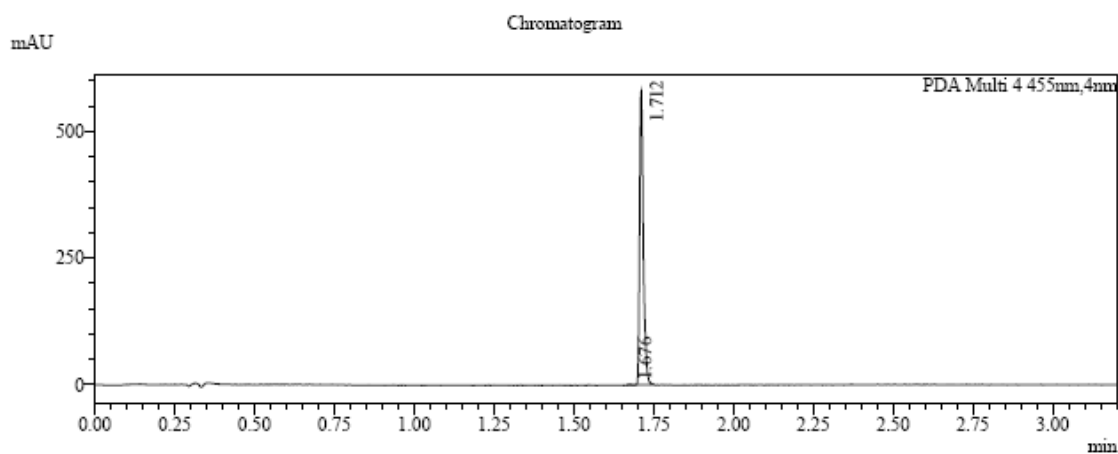

Peak Table

PDA Ch4 455nm

| Peak# | Ret. Time | Height | Height% | Area   | Area%   |
|-------|-----------|--------|---------|--------|---------|
| 1     | 1.676     | 1586   | 0.357   | 1643   | 0.350   |
| 2     | 1.712     | 442736 | 99.643  | 467346 | 99.650  |
| Total |           | 444322 | 100.000 | 468989 | 100.000 |

**b. HPLC-C2**

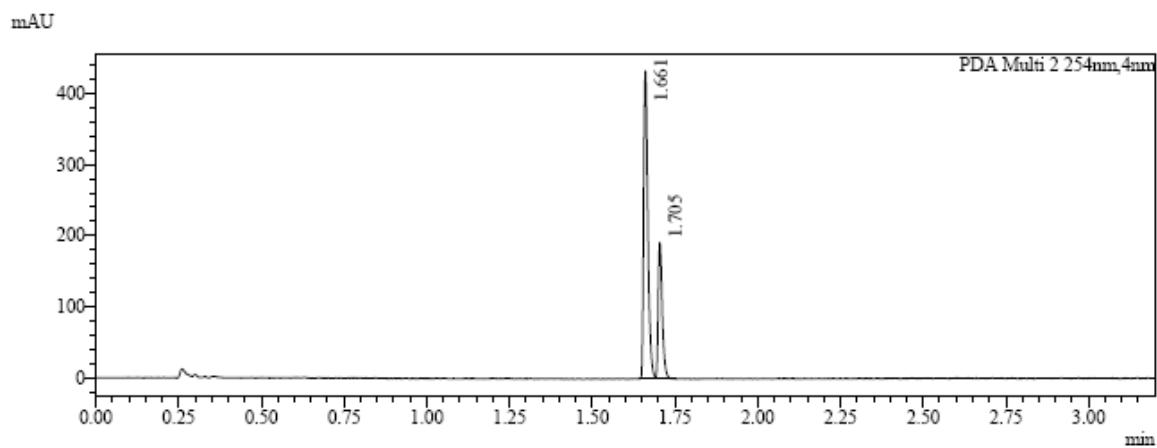

PDA Ch2 254nm

| Peak# | Ret. Time | Height | Height% | Area   | Area%   |
|-------|-----------|--------|---------|--------|---------|
| 1     | 1.661     | 403992 | 69.542  | 382973 | 70.356  |
| 2     | 1.705     | 176942 | 30.458  | 161366 | 29.644  |
| Total |           |        |         | 544339 | 100.000 |

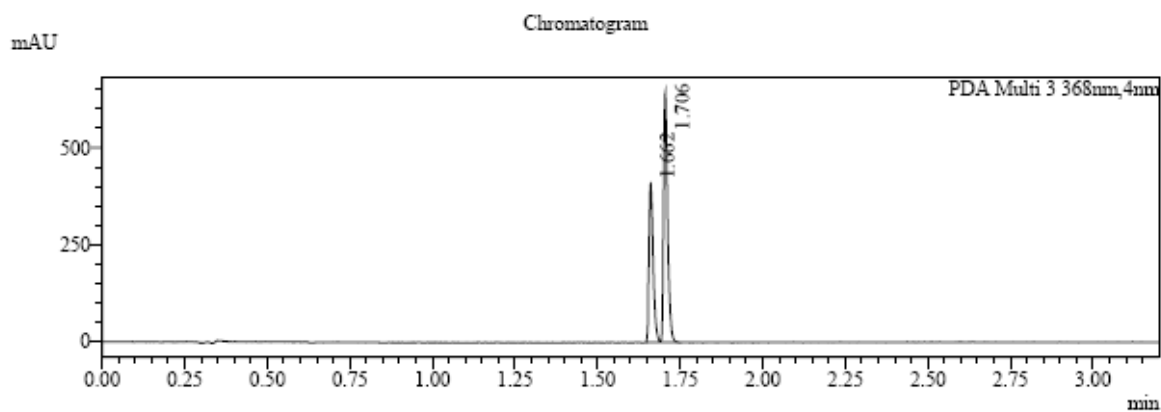

Peak Table

PDA Ch3 368nm

| Peak# | Ret. Time | Height | Height% | Area   | Area%   |
|-------|-----------|--------|---------|--------|---------|
| 1     | 1.662     | 377385 | 43.234  | 360278 | 40.160  |
| 2     | 1.706     | 495507 | 56.766  | 536825 | 59.840  |
| Total |           | 872891 | 100.000 | 897103 | 100.000 |

### Mass Spectrum

Line#:1 R.Time:1.687(Scan#:254)  
MassPeaks:140  
Spectrum Mode:Single 1.687(254) BasePeak:378(9263381)  
BG Mode:None Segment 1 - Event 1

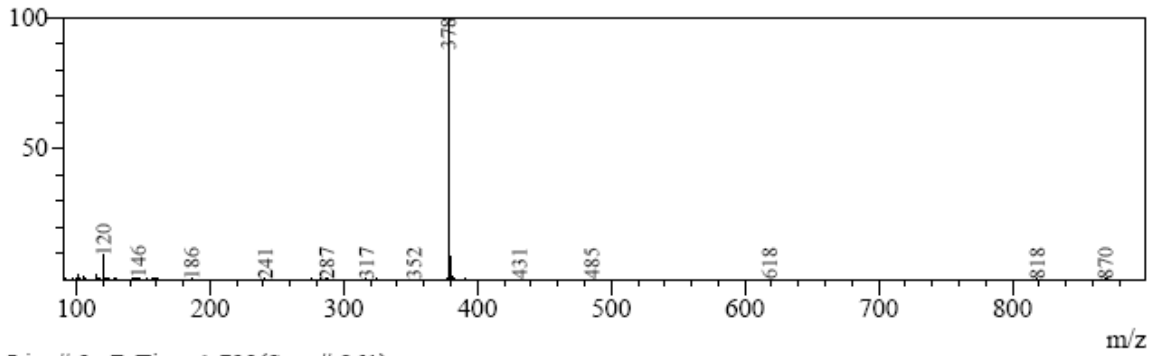

Line#:2 R.Time:1.733(Scan#:261)  
MassPeaks:163  
Spectrum Mode:Single 1.733(261) BasePeak:378(8026489)  
BG Mode:None Segment 1 - Event 1

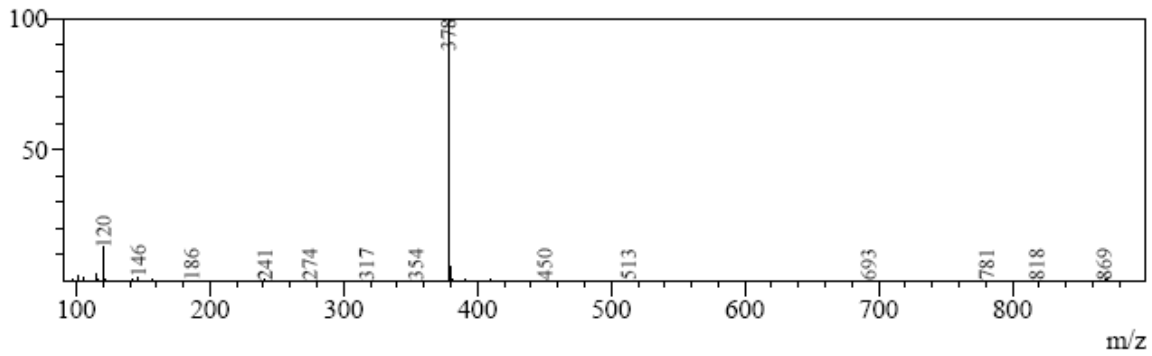

HPLC-C2

c. HPLC-C3

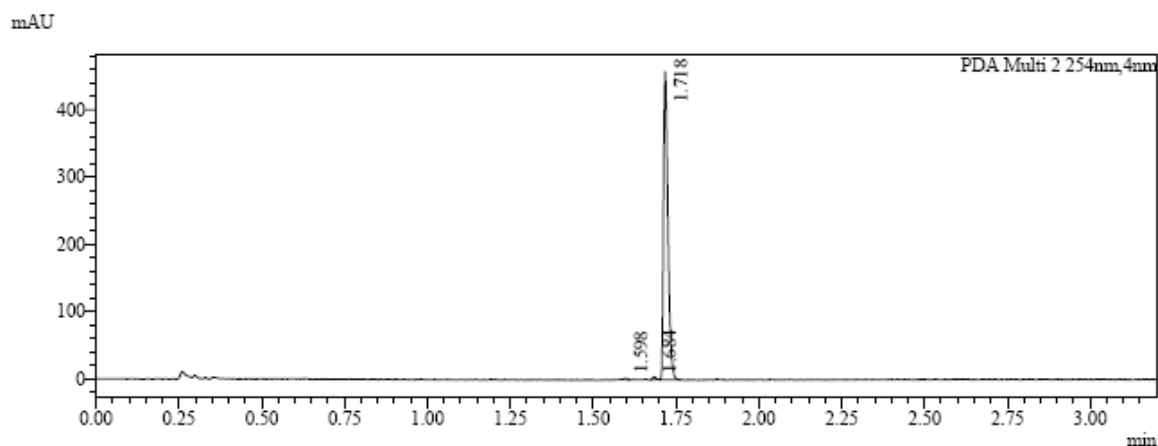

PDA Ch2 254nm

| Peak# | Ret. Time | Height | Height% | Area   | Area%   |
|-------|-----------|--------|---------|--------|---------|
| 1     | 1.598     | 1849   | 0.408   | 1230   | 0.284   |
| 2     | 1.684     | 3692   | 0.815   | 2478   | 0.572   |
| 3     | 1.718     | 447228 | 98.776  | 429587 | 99.144  |
| Total |           |        |         | 433295 | 100.000 |

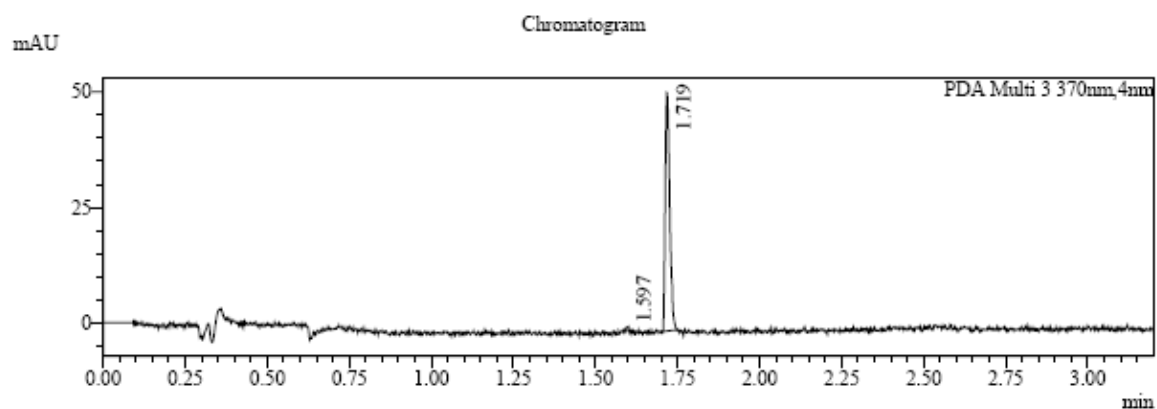

Peak Table

PDA Ch3 370nm

| Peak# | Ret. Time | Height | Height% | Area  | Area%   |
|-------|-----------|--------|---------|-------|---------|
| 1     | 1.597     | 755    | 1.577   | 210   | 0.423   |
| 2     | 1.719     | 47122  | 98.423  | 49432 | 99.577  |
| Total |           | 47877  | 100.000 | 49642 | 100.000 |

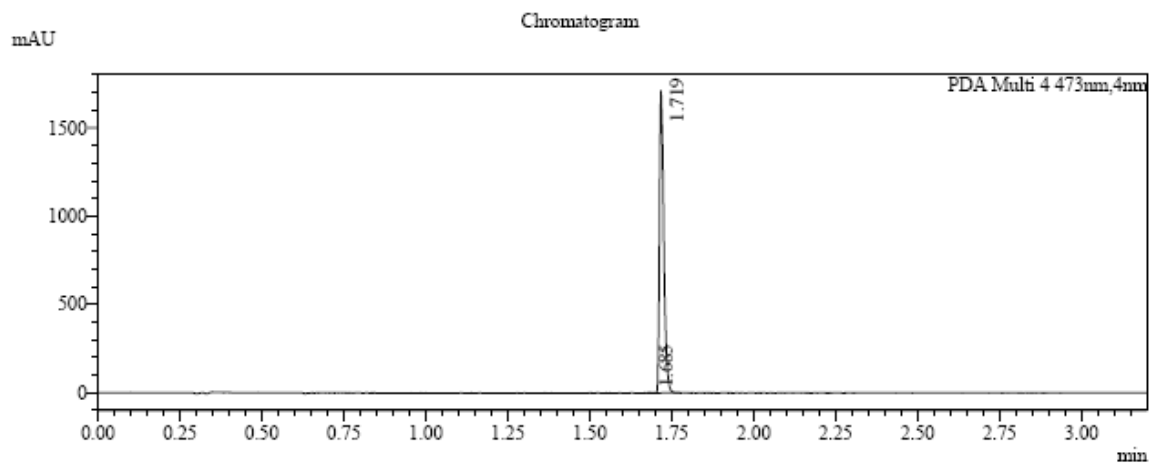

Peak Table

PDA Ch4 473nm

| Peak# | Ret. Time | Height  | Height% | Area    | Area%   |
|-------|-----------|---------|---------|---------|---------|
| 1     | 1.685     | 2674    | 0.177   | 2095    | 0.133   |
| 2     | 1.719     | 1507197 | 99.823  | 1571711 | 99.867  |
| Total |           | 1509871 | 100.000 | 1573806 | 100.000 |

**d. HPLC-C4**

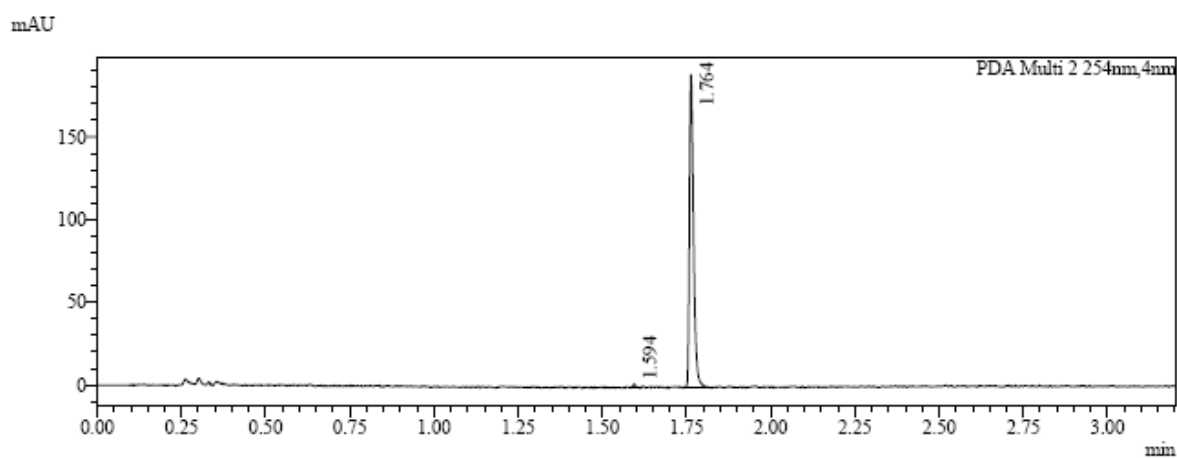

PDA Ch2 254nm

| Peak# | Ret. Time | Height | Height% | Area   | Area%   |
|-------|-----------|--------|---------|--------|---------|
| 1     | 1.594     | 1827   | 0.980   | 939    | 0.579   |
| 2     | 1.764     | 184488 | 99.020  | 161162 | 99.421  |
| Total |           |        |         | 162101 | 100.000 |

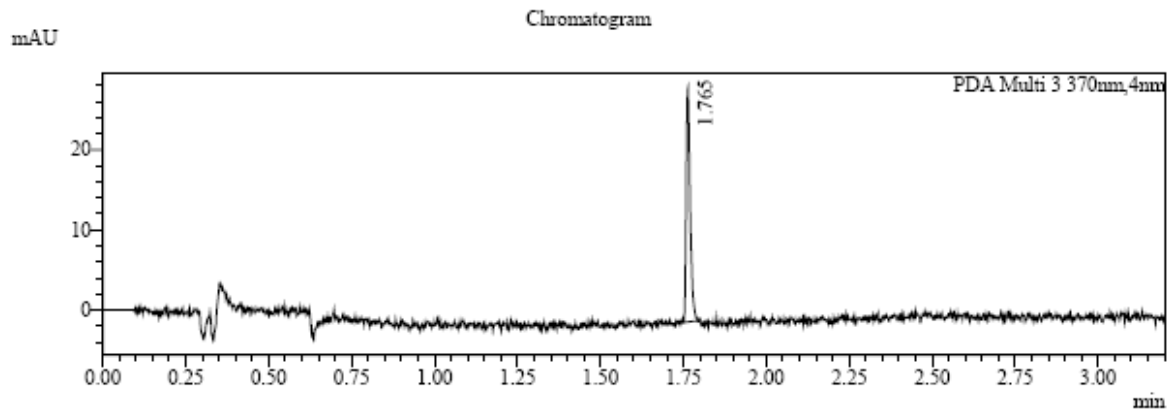

Peak Table

PDA Ch3 370nm

| Peak# | Ret. Time | Height | Height% | Area  | Area%   |
|-------|-----------|--------|---------|-------|---------|
| 1     | 1.765     | 26249  | 100.000 | 24618 | 100.000 |
| Total |           | 26249  | 100.000 | 24618 | 100.000 |

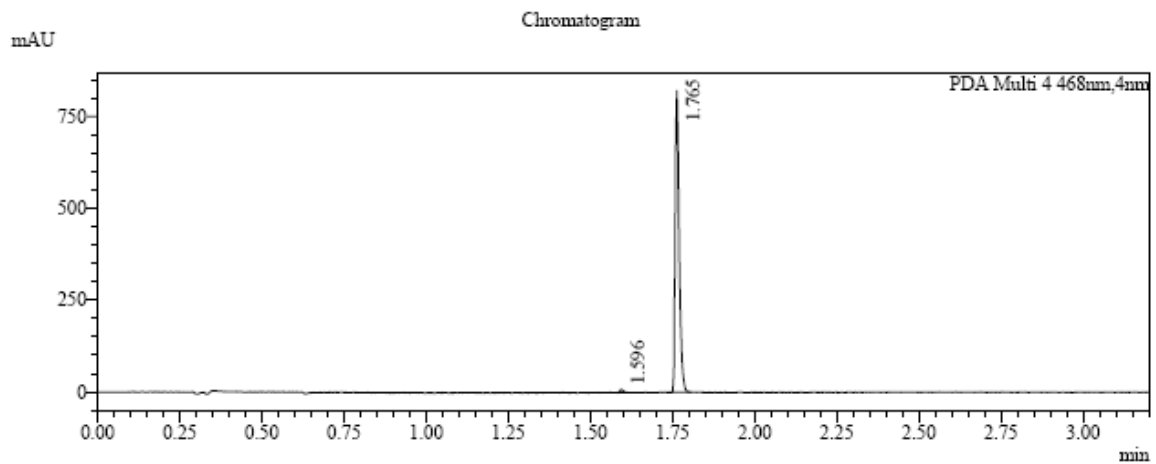

Peak Table

PDA Ch4 468nm

| Peak# | Ret. Time | Height | Height% | Area   | Area%   |
|-------|-----------|--------|---------|--------|---------|
| 1     | 1.596     | 6993   | 0.934   | 5912   | 0.861   |
| 2     | 1.765     | 741445 | 99.066  | 681125 | 99.139  |
| Total |           | 748438 | 100.000 | 687038 | 100.000 |

e. HPLC-C5

mAU

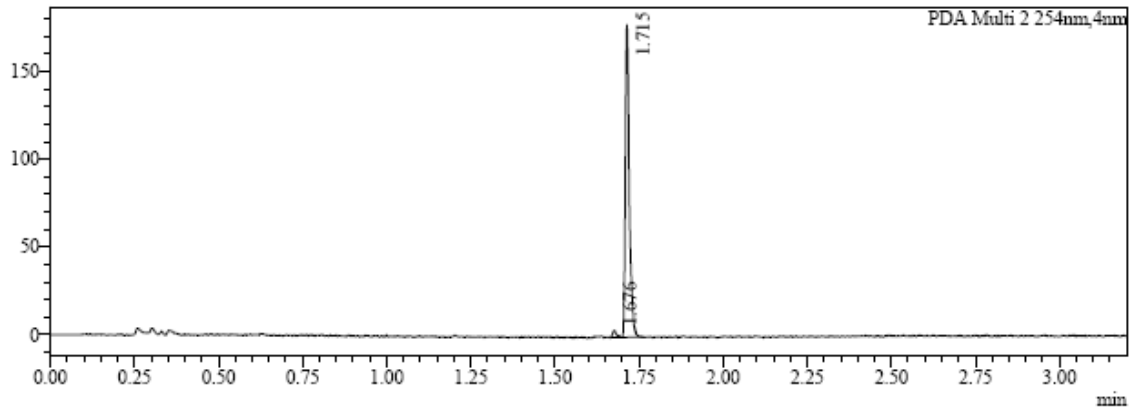

PDA Ch2 254nm

| Peak# | Ret. Time | Height | Height% | Area   | Area%   |
|-------|-----------|--------|---------|--------|---------|
| 1     | 1.676     | 3605   | 2.031   | 3124   | 2.057   |
| 2     | 1.715     | 173859 | 97.969  | 148699 | 97.943  |
| Total |           |        |         | 151822 | 100.000 |

mAU

Chromatogram

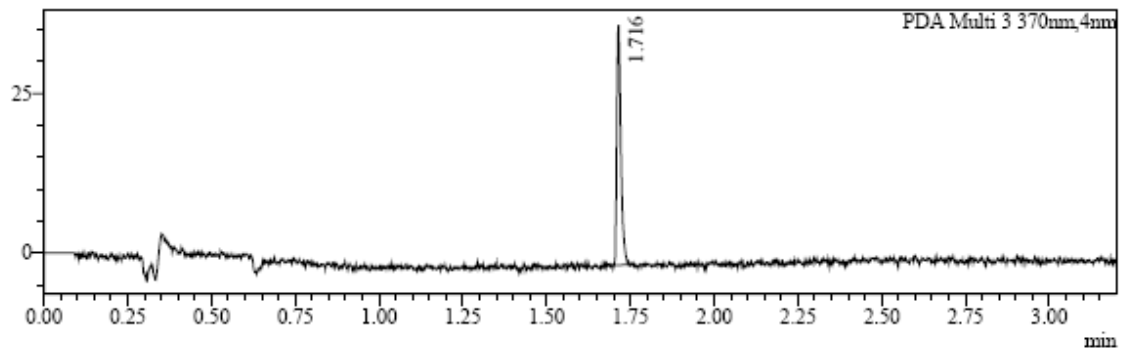

Peak Table

PDA Ch3 370nm

| Peak# | Ret. Time | Height | Height% | Area  | Area%   |
|-------|-----------|--------|---------|-------|---------|
| 1     | 1.716     | 32563  | 100.000 | 31496 | 100.000 |
| Total |           | 32563  | 100.000 | 31496 | 100.000 |



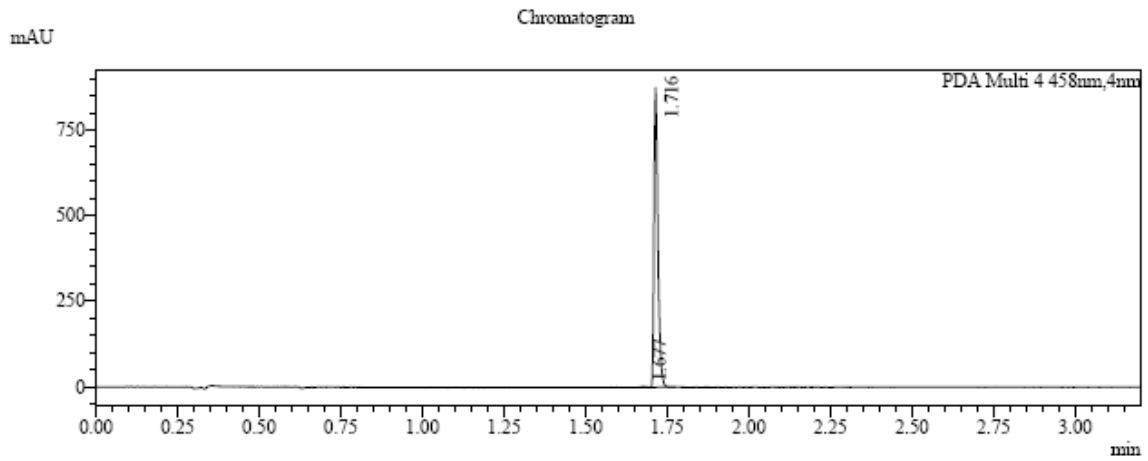

Peak Table

PDA Ch4 458nm

| Peak# | Ret. Time | Height | Height% | Area   | Area%   |
|-------|-----------|--------|---------|--------|---------|
| 1     | 1.677     | 2120   | 0.279   | 2073   | 0.286   |
| 2     | 1.716     | 757793 | 99.721  | 721678 | 99.714  |
| Total |           | 759913 | 100.000 | 723751 | 100.000 |

**f. HPLC-C6**

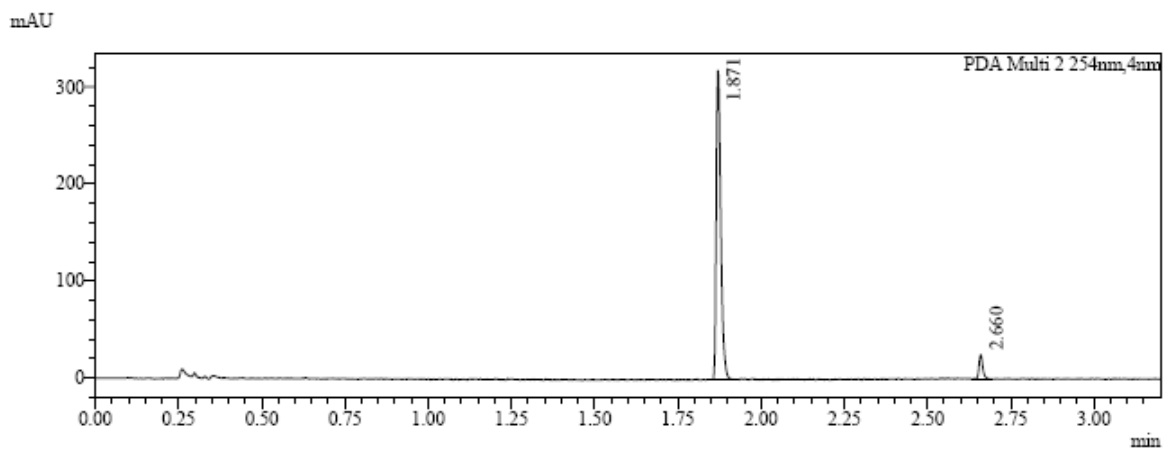

PDA Ch2 254nm

| Peak# | Ret. Time | Height | Height% | Area   | Area%   |
|-------|-----------|--------|---------|--------|---------|
| 1     | 1.871     | 313088 | 93.037  | 304132 | 94.006  |
| 2     | 2.660     | 23430  | 6.963   | 19393  | 5.994   |
| Total |           |        |         | 323525 | 100.000 |

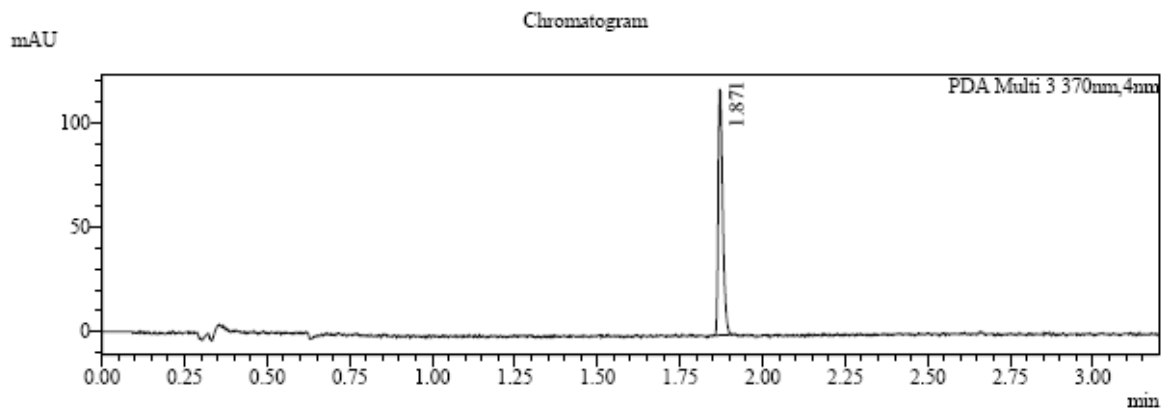

Peak Table

PDA Ch3 370nm

| Peak# | Ret. Time | Height | Height% | Area   | Area%   |
|-------|-----------|--------|---------|--------|---------|
| 1     | 1.871     | 99204  | 100.000 | 112439 | 100.000 |
| Total |           | 99204  | 100.000 | 112439 | 100.000 |

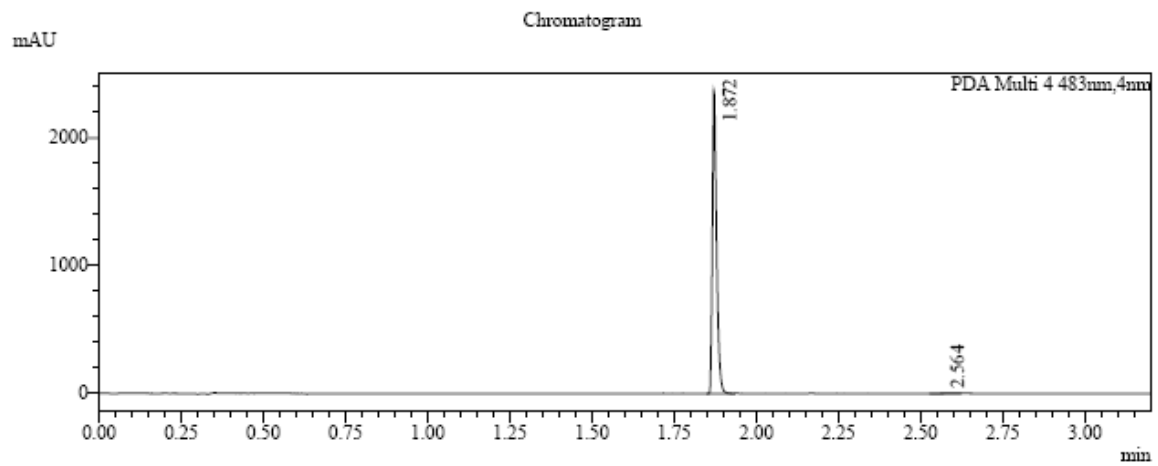

Peak Table

PDA Ch4 483nm

| Peak# | Ret. Time | Height  | Height% | Area    | Area%   |
|-------|-----------|---------|---------|---------|---------|
| 1     | 1.872     | 1821750 | 99.940  | 2080761 | 99.823  |
| 2     | 2.564     | 1090    | 0.060   | 3682    | 0.177   |
| Total |           | 1822840 | 100.000 | 2084443 | 100.000 |

## Mass Spectrum

Line#:1 R.Time:1.920(Scan#:289)  
MassPeaks:154  
Spectrum Mode:Single 1.920(289) BasePeak:441(6036038)  
BG Mode:None Segment 1 - Event 1

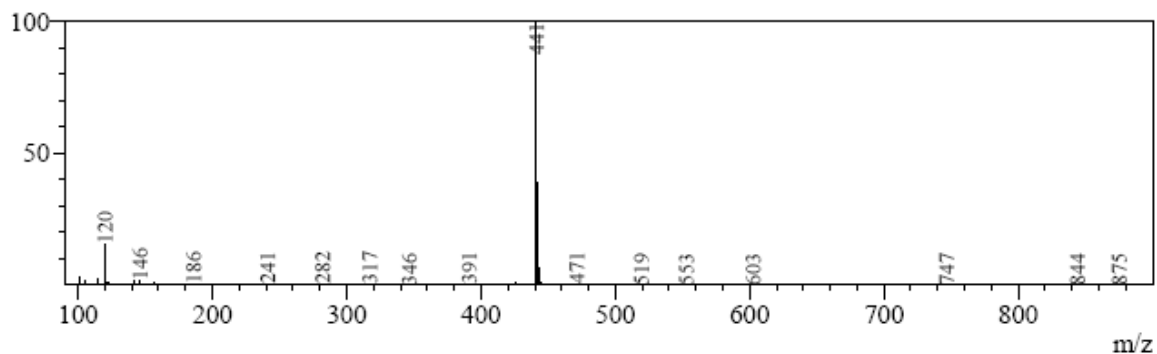

Line#:2 R.Time:2.680(Scan#:403)  
MassPeaks:271  
Spectrum Mode:Single 2.680(403) BasePeak:441(3089488)  
BG Mode:None Segment 1 - Event 1

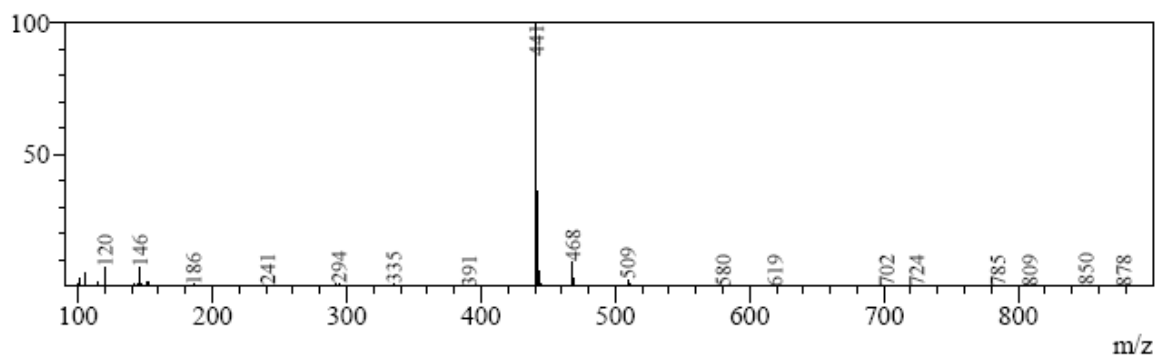

Figure S1. The spectra of HPLC of dyes C1-C6

## 2. The absorption spectra of dyes C1-C6 in different solvents

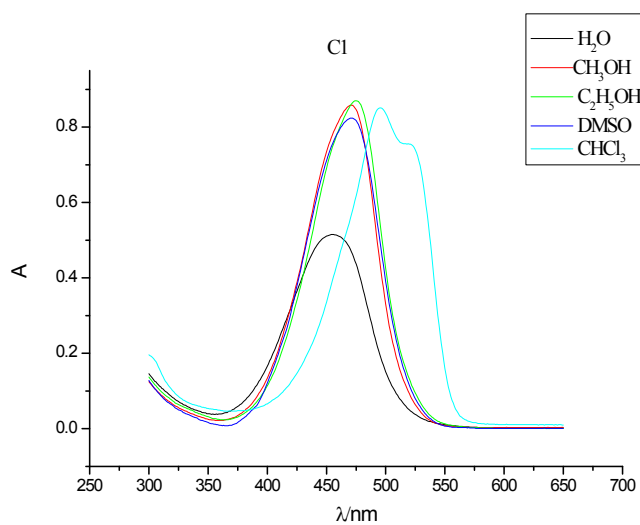

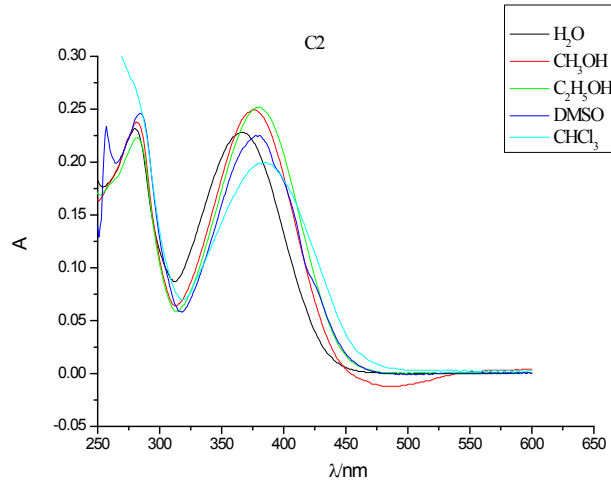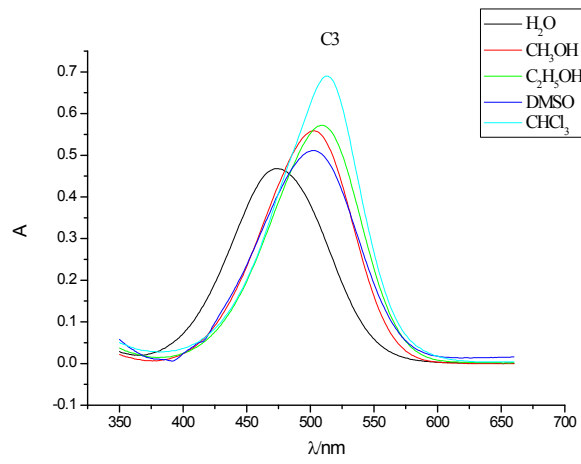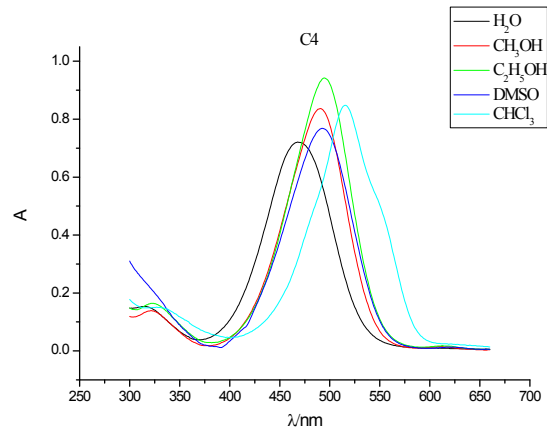

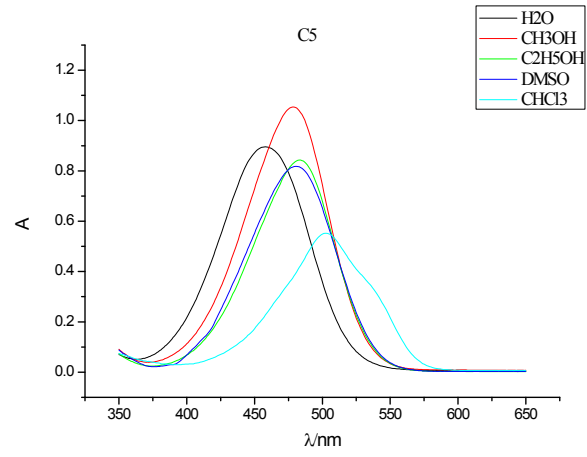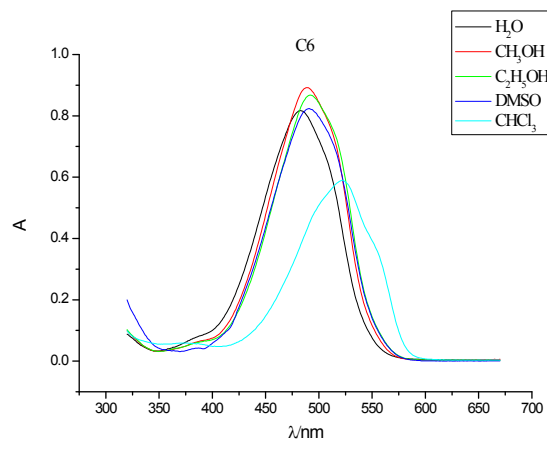

Figure S2. The absorption spectra of dyes **C1-C6** in different solvents
